## 1 Title

# 3 Protein structure-based gene expression signatures

## 5 Authors

7 R. Rahman<sup>1</sup>, Y. Xiong<sup>1,2</sup>, J. G. C. van Hasselt<sup>1</sup>, J. Hansen<sup>1,2</sup>, E. A. Sobie<sup>1,2</sup>, M. R. Birtwistle<sup>1,3</sup>, E. Azeloglu<sup>1,4</sup>, R.  
8 Iyengar<sup>1,2\*</sup>, and A. Schlessinger<sup>1\*</sup>

## 10 Affiliations

12 <sup>1</sup>Department of Pharmacological Sciences, Icahn School of Medicine at Mount Sinai, New York, NY 10029.

13 <sup>2</sup>Institute for Systems Biomedicine, Icahn School of Medicine at Mount Sinai, New York, NY 10029.

14 <sup>3</sup>Department of Chemical and Biomolecular Engineering, Clemson University, Clemson, SC 29634.

15 <sup>4</sup>Division of Nephrology, Icahn School of Medicine at Mount Sinai, New York, NY 10029.

## 17 Abstract

19 Gene expression signatures (GES) connect phenotypes to mRNA expression patterns, providing a  
20 powerful approach to define cellular identity, function, and the effects of perturbations. However,  
21 the use of GES has suffered from vague assessment criteria and limited reproducibility. The  
22 structure of proteins defines the functional capability of genes, and hence, we hypothesized that  
23 enrichment of structural features could be a generalizable representation of gene sets. We derive  
24 structural gene expression signatures (sGES) using features from various levels of protein  
25 structure (e.g. domain, fold) encoded by the transcribed genes in GES, to describe cellular  
26 phenotypes. Comprehensive analyses of data from the Genotype-Tissue Expression Project  
27 (GTEx), ARCHS4, and mRNA expression of drug effects on cardiomyocytes show that structural  
28 GES (sGES) are useful for identifying robust signatures of biological phenomena. sGES also  
29 enables the characterization of signatures across experimental platforms, facilitates the  
30 interoperability of expression datasets, and can describe drug action on cells.

## 32 MAIN TEXT

### 34 Introduction

35 Gene expression signatures (GES) are generally defined as a ranked list of genes whose  
36 differential expression is associated with a defined biological phenomenon (1–3). GES are  
37 typically obtained by measuring the transcriptional level of genes through RNA sequencing or  
38 previously by array-based experiments. Often, GES sets are determined, for example, by taking  
39 the top 100 or 200 highly expressed genes, or by using particular *p*-value cutoffs (3). Thousands  
40 of GES have been identified and claimed to characterize a wide variety of biological phenomenon  
41 (1–3). GES have been used to characterize subcellular and whole cell functions (4, 5),  
42 pathological states (6, 7) and cellular response to perturbagens (8). However, due to differences in  
43 technology, normalization protocols, and practices across laboratories, there is variability in  
44 identifying robust GES for a given phenotype, which has hindered its utility in the clinic (9, 10).

45 Determining the reproducibility of a signature for a phenotype of interest remains a challenge,  
46 often requiring meta-analyses of existing GES to validate a signature for a phenotype (2, 3, 10).  
47 This process includes analyses of thousands of independent samples to generate a robust signature  
48 for a single phenotype (11). For example, GES variability has led to the cancelation of clinical  
49 trials that linked endpoints to specific GES and can produce inconsistent results in the  
50 classification of patients for distinct subtypes of a cancer (10, 12). Numerous studies have

51 analyzed the robustness of gene expression signatures across studies –further highlighting GES  
52 limitations (10, 12–16).

53 One way to improve the robustness of GES is to integrate multiple types of useful biological  
54 information (1, 17). Because genes encode proteins whose 3D structures execute functions, we  
55 hypothesize that enriched protein structures may define a generalizable representation of any  
56 given gene set. Particularly, one common structural characteristic of proteins is the overall  
57 structural family or “fold” of the protein and/or its individual domains, which have direct  
58 association with gene function (18–20). For example, incorporating structural information has  
59 enhanced the prediction of protein-protein interaction networks and disease pathways (21, 22). In  
60 this study, we derived higher order structural features from ranked gene lists to yield robust  
61 structural GES (sGES). We show that sGES can produce reliable signatures of distinct tissue  
62 types. Additionally, integration of sGES with GES, through an autoencoder, can be used to  
63 precisely identify outlier samples between distinct gene expression datasets, facilitating  
64 interoperability between experiments that use differing transcriptomic methodologies. Finally, we  
65 demonstrate that sGES can be used to characterize biological phenomena, such as cellular  
66 response to perturbagens, adding an additional dimension of insights to existing transcriptomics  
67 analysis.

## 68 **Results**

### 69 ***Quantitative metrics to evaluate GES and sGES reproducibility***

70 To characterize reproducibility of signatures of given phenotype we defined relevant, quantitative  
71 properties to describe the quality of a dataset. We posit that a reproducible GES would have  
72 three major properties: 1. consistency across independent samples and replications; 2. high  
73 predictive capacity for the phenotype using standard performance measures (23); and 3.  
74 robustness across different measurement platforms.  
75

76 We use the Jaccard coefficient ( $J_C$ ), which measures the overlap between two distinct gene sets, to  
77 measure consistency between signatures characterizing the same phenotype in independent  
78 samples (Methods; **Fig. 1A**). A high  $J_C$  demonstrates that the gene signature is consistent across  
79 experimental samples. Furthermore, a low variance for a distribution  $J_C$  values across several  
80 hundred independent samples may indicate signatures with high reproducibility.

81 To evaluate the predictive performance of a signature to a phenotype, we used a standardized  
82 machine learning algorithm (a random forest) across all signatures to assess the baseline  
83 effectiveness of a given signature, in terms of area under the ROC curve (AUC), without any  
84 significant parameter optimizations or feature selection (Methods; **Fig. 1A**). To measure signature  
85 robustness, we computed both  $J_C$  and AUC values of signatures across two independent datasets  
86 measuring an identical phenotype (Methods; **Fig. 1A**). We analyzed expression data from GTEx  
87 (v8.0), which categorizes 11,688 samples across 53 healthy tissues from 714 donors (**Table**  
88 **S1**)(24). We leverage ARCHS4 (25), a collection of GES mined from the Gene Expression  
89 Omnibus, as an independent, and nonoverlapping, collection of GES of tissue types analyzed in  
90 GTEx (**Fig. 1B,D**). The overall workflow is shown in **Fig. 1E**.

### 91 ***Protein structure enrichment at any level captures relevant biological information from gene*** 92 ***expression experiments***

93 Protein structures encoded by the genes constituting the expressed genes may characterize the  
94 cell’s phenotype. Therefore, we hypothesize that using features derived from protein structures in  
95 GES can improve reproducibility across experimental platforms. A ‘structural gene expression  
96 signature’ (sGES) for each gene set was determined by identifying available structural features  
97 from the encoded protein of each gene (Methods; **Fig. 1C-D**). We define a structural feature as

98 the structural hierarchy from the Structural Classification of Proteins extended [SCOPe] (26) and  
99 InterProscan (27) databases, where protein domains (10,637 domains, ex. Serine-  
100 threonine/tyrosine-protein kinase, catalytic domain) are categorized into families (4,919 families,  
101 ex. Protein kinases, catalytic subunit), which are categorized into superfamilies (2,026  
102 superfamilies; Protein kinase-like) and further grouped into distinct folds (1,232; Protein kinase-  
103 like) (Methods; **Fig. 1C**). For a given gene set, each structural feature was evaluated for  
104 enrichment in the gene set, compared to the counts of the structural feature in the human  
105 proteome (Methods; **Fig. 1D**). sGES are defined as the complete set of structural features derived  
106 from a ranked list of genes, at each structural level (domain to fold levels).

107 To determine if protein structure enrichment captures biological information observed in GES, we  
108 utilized t-distributed Stochastic Network Embedding (t-SNE) (28) to cluster GTEx tissues  
109 samples based on top 250 highest expressed genes and their enriched structural features (**Fig. 2**,  
110 **Fig. S1**). We observed that sGES are capable of clustering tissue types at both the lowest  
111 structural level (domains) and, surprisingly, the highest structural level (folds). Importantly, the  
112 clusters at all structural levels capture functional and spatial relationships among tissues (**Fig. S1**).

113 For example, ovary tissue sGES cluster near uterine signatures. Both tissues' GES are enriched  
114 with protein domains related to sex hormone production such as Follistatin/Osteonectin EGF  
115 domain, Kazal domain, SPARC/Testican, and Fibrillar collagen domain (**Fig. S2**). Both tissues'  
116 sGES also retain tissue-specific domain differences, such as ovarian tissue having structural  
117 signatures containing Glutathione transferase domains, which is a biomarker of oocyte viability  
118 and quality (18). While the uterine tissue enriching for proteins containing structural domains  
119 such as the Tubulin/FtsZ domain (19).

120 This result is surprising because conservation of high level protein structure (i.e., fold) is not  
121 necessarily always predictive of protein function (20), yet, using a representation of folds,  
122 domains and families, independently, can constitute an expression signature that captures tissue  
123 types.

#### 124 *sGES improves within-dataset consistency of gene expression data.*

125 We computed the  $J_C$  values for each pair of samples from the same tissue type, using both GES  
126 and sGES (**Fig. 3A**). Consistency of sGES, as measured by  $J_C$ , at all structural levels, increases as  
127 higher order sGES are used (**Fig. 3A, Fig. S3**). For a gene set size of 250, sGES significantly  
128 increase the mean within-tissue  $J_C$  compared to GES across all tissue types (**Fig. 3A, Table S2**).  
129 For example, at the fold level, the mean within tissue  $J_C$  reaches a value of 0.75, while the mean  
130 across-tissue  $J_C$  reaches a value of 0.54 (**Fig. 3B**). The increase in  $J_C$  at higher structural levels  
131 indicates increasing consistency of signatures (**Fig. 3A**).

132 One explanation for this improvement in consistency may be due to the number of possible  
133 structures diminishing as higher order structural features are used (**Fig. S4**). However, we observe  
134 that while the mean  $J_C$  generally increases using sGES, disparate tissue types have significantly  
135 lower  $J_C$  values at each structural level (**Fig. 3B**); retaining tissue-specific information, as  
136 observed from the t-SNE (**Fig. 2**). Importantly, the average consistency of dissimilar (or across-  
137 tissue) samples using sGES is similar to that of GES (for Domain and Family levels), even at  
138 increasing GES sizes (**Fig. 3B-C**). This result asserts that the higher average  $J_C$  seen in sGES is  
139 unlikely to be an artifact of decreasing feature space sizes since GES have similar across-tissue  $J_C$   
140 values to sGES, despite a higher feature space.

#### 141 *sGES accurately classifies cell type with a simple machine learning model*

142 A major test of GES reproducibility is the ability of a GES for a phenotype, obtained in one  
143 sample, to accurately predict the phenotype for a gene signature derived in an independent sample  
144 measuring the same phenotype (i.e., predictivity, **Fig. 1A**). To evaluate the baseline predictivity of

145 both GES and sGES across different tissues, and signature types (Methods), we trained a random  
146 forest to identify tissues from either GES of size of 250 or sGES from GTEx expression data.  
147 Notably, the parameters for the random forest were standardized and neither feature selection nor  
148 parameter optimization was performed on any model (Methods, **Fig. 3D**, **Fig. S5**).

149 We observe that both GES and sGES (at any structural level) have high predictivity for any given  
150 tissue type within the GTEx dataset, after 10-fold cross validation. For example, the best area  
151 under the ROC curve (AUC) values for each tissue range from 0.891 (ectocervix) to 1 (lung) (**Fig.**  
152 **S5**). Importantly, the tissue with the largest variance in  $J_C$  distribution (i.e., ectocervix) has the  
153 lowest predictive performance, indicating a relationship between the two metrics. There are small  
154 differences in the predictivity among gene set sizes of 50, 250, and 1,000 across all tissue types  
155 within GTEx (**Fig. S6**).

### 156 *sGES enable the classification of robust expression signatures across databases*

157 We used an independent validation set from the ARCHS4 (25) database to evaluate the robustness  
158 of tissue GES and sGES from GTEx data (**Fig. 4**, **Fig. S7-S10**). In brief, ARCHS4 is a collection  
159 of gene expression data derived from the Gene Expression Omnibus (GEO) (29), which collates  
160 gene expression data generated from a wide variety of sequencing technologies and platforms.  
161 Specifically, we evaluated GTEx signatures for consistency (**Fig. 4A-B**, **Fig. S7- S8**) and  
162 predictivity against ARCHS4 (**Fig. 4C-D**, **Fig. S9-S10**).

163 In general, ARCHS4 GES consistency is much more variable across tissue types than that of  
164 GTEx GES (**Fig. 4A**; **purple**, and **Fig. S7**), likely because of the heterogeneity of the samples in  
165 ARCHS4. Samples in ARCHS4 can be obtained from both pathological and healthy tissues, or  
166 may characterize distinct subtypes of tissues, or may have artifacts due to differing sequencing  
167 methodologies. Importantly, measuring the consistency between ARCHS4 and GTEx by  
168 overlapping their GES alone demonstrated low  $J_C$  values across most tissue types (**Fig. 4A**; **blue**,  
169 **Fig. S7**). Critically, we observed that for all tissues, sGES, at any structural level, increases the  
170 average  $J_C$  overlap between GTEx and ARCHS4 signatures, and thus improves the consistency  
171 between the two datasets (**Fig. 4B**, **Fig. S8**).

172 Surprisingly, there is high predictivity of tissues from ARCHS4 using standardized models  
173 trained either on GES or sGES from GTEx (**Fig. 4C-D** and **Fig. S9-S10**). For example, AUC  
174 values for each tissue range from 0.70 (pancreas) to 0.999 (vagina) (**Fig. 4C**, **Fig. S9**).  
175 Importantly, decreasing GES size to 50 genes for many tissue types has significant effects on the  
176 performance of the classifier (**Fig. 4C**, **Fig. S9**). Several tissues such as pancreas and heart exhibit  
177 better performance using a small GES size. This indicates that much of the predictive  
178 performance of these signatures may be due to a select set of genes, rather than the signature as a  
179 whole (**Fig. 4C**, **Fig. S9-10**).

180 Using both metrics, we can identify that certain tissues such as pancreas, lung and esophagus, are  
181 not robust across GTEx and ARCHS4 due to relatively low AUC and  $J_C$  values. The only  
182 potentially robust signature observed is muscle tissue, where high internal consistency within  
183 ARCHS4 and GTEx GES led to a relatively higher overlap  $J_C$  distribution across the two datasets  
184 (**Fig. 4A-D**). We hypothesize that identifying and removing pathological and other atypical  
185 samples ('outliers') present in the ARCHS4 data will improve reproducibility across datasets.  
186 (**Fig. 4A**).

### 187 *Integration of sGES and GES enable high outlier detection*

188 To identify potential outliers in GTEx samples, we used a neural network architecture called an  
189 autoencoder (Methods) (30). Autoencoders encode high dimensional data to a lower dimensional  
190 feature space that can regenerate the input of the network. The performance of an autoencoder is  
191 measured by the reconstruction error between the original inputs and the reconstructed output.



192 Samples with high reconstruction error are often samples that are considered anomalies, or  
193 outliers, compared to the samples used to train the model.

194 We trained a stacked denoising autoencoder on 80% of GTEx GES. The remaining 20% of the  
195 GTEx GES was used to determine the baseline level of reconstruction error of the autoencoder  
196 (**Fig. 5A; green, Fig. S11**). We defined samples with reconstruction errors greater than two  
197 standard deviations of the reconstruction error (.00725) as outlier samples within GTEx.  
198 Importantly, based on this definition, very few GTEx samples can be considered outliers.

199 When using our trained GTEx model with ARCHS4 GES, the majority of ARCHS4 samples,  
200 within the same tissue type, are classified as ‘outliers’ (**Fig. 5A; purple, Fig. S11**). This result  
201 corroborates some results such as pancreas tissue – whose signature was demonstrated to be not  
202 robust across ARCHS4 and GTEx (**Fig. 4**). However, all ARCHS4 muscle tissue samples, which  
203 was shown to have some level of robustness (**Fig. 4**), can be considered wholly distinct datasets  
204 using this approach. Because sGES improve the overlap of  $J_C$  scores across datasets and do not  
205 dramatically impact their predictivity (**Fig. 4**), we trained an autoencoder using sGES to see if  
206 outlier detection can be improved.

207 While we expected outlier detection to be less sensitive by ascending the structural hierarchy, as  
208 observed before (**Fig. 2-4**), surprisingly, distinct levels of structure have differing sensitivity to  
209 outliers (**Fig. 5B, Fig. S12**). For muscle tissue, the family and superfamily levels of sGES  
210 identified less outliers than those identified by domain, fold or gene level signatures. This  
211 indicates that distinct levels of the structure hierarchy characterize unique aspects of biological  
212 information present in GES.

213 We hypothesized that integrating GES and sGES would allow us to obtain a consensus  
214 classification of outlier vs non-outlier samples. To do so, we normalized and then averaged the  
215 reconstruction errors from autoencoders trained on GES and sGES (**Fig. 5C, Fig. S13**). Compared  
216 to either the GES (**Fig. 5A**) or sGES models (**Fig. 5B**), incorporating all signature information  
217 enables a clearer separation of true outliers in the data (**Fig. 5C, Fig. S13**). For example, this  
218 approach indicated that all pancreas tissue signatures from the ARCHS4 database can be  
219 considered outliers to GTEx pancreas signatures and thus, validated that the pancreas signature is  
220 not robust across datasets. However, for tissues such as muscle, ovary, heart, and spleen, outliers  
221 can be easily identified (**Fig. 5C**). For instance, GSM1281783, the sample with the largest  
222 reconstruction error in heart tissue in ARCHS4, characterizes dilated cardiomyopathy. Likewise,  
223 GSM2071283 (muscle) represents a sample from fetal skeletal muscle tissue, which is different  
224 from healthy adult muscle cells characterized in GTEx (**Fig. 5C**). Importantly, when identifying  
225 and removing outlier samples from ARCHS4, the predictivity and consistency of the signatures  
226 across GTEx and ARCHS4, for both GES and sGES, increased (**Fig. 5D-E, Fig. S14-S15**). We  
227 also observed increase in ARCHS4 internal GES consistency after outlier removal (**Fig. S16**).

228 After outlier removal, we were able to identify specific signature genes and sGES that are  
229 common across all ARCHS4 and GTEx samples (**Table S7-S8**). **Table S8** shows signature genes  
230 and enriched domains, families, superfamilies, and folds seen across every ARCHS4 and GTEx  
231 whole blood samples, after outlier removal. While only two genes are consistently seen across  
232 both datasets (Actin Beta, Ferritin Light Chain), several domains (such as protein kinase domain,  
233 Immunoglobulin-like domain), families (such as C1 set domains, Pyruvate oxidase and  
234 decarboxylase PP module), superfamilies (such as EF-hand, Clathrin adaptor appendage domain),  
235 and folds (such as P-loop containing nucleoside triphosphate hydrolases, SH3-like barrel) were  
236 observed in the whole blood signature, demonstrating that sGES can illuminate additional  
237 biological information not present in GES alone.

238 Taken together, our results indicate that utilization and integration of both gene and protein  
239 structure information can dramatically improve the identification of outliers and enables the  
240 detection of robust expression signatures across datasets.

### 241 *sGES captures drug action on cardiomyocyte-like cell lines*

242 We investigated if sGES alone can describe drug action on newly obtained transcriptomics data.  
243 We analyzed expression data from cardiomyocyte-like cell lines generated by the DToxS LINCS  
244 Center, to identify perturbation specific cardiomyocyte response to specific drugs. We observed  
245 that certain over and underrepresented protein folds distinguish kinase inhibitor response from  
246 anthracycline drugs (**Fig. 6A-C**). For example, the kinase inhibitors nilotinib (NIL), regorafenib  
247 (REG), sorafenib (SOR), pazopanib (PAZ), and vemurafenib (VEM) have a characteristic  
248 underexpression of folds relating to metabolism (**Table S9**). Conversely, the anthracycline drugs  
249 epirubicin (EPI) and doxorubicin (DOX), have characteristic overexpression of folds related to  
250 cytokine action (**Table S9**) as well as underexpression of folds relating to tRNA regulation such  
251 as: Proline tRNA ligase; Prolyl-tRNA synthetase; Aminoacyl-tRNA synthetases; Transmembrane  
252 ATPases; aminoacyl-tRNA synthetases; Anticodon-binding and Cortactin-binding protein (**Table**  
253 **S10**). Taken together, fold level sGES alone can further specify drug activity on cardiomyocytes,  
254 in addition to ranked lists of expressed genes.

## 255 **Discussion**

256  
257  
258 In this study, we hypothesized that transforming gene signature space into protein structure space  
259 (e.g., domain, fold, superfamily) can characterize a robust, reproducible structural GES (sGES),  
260 and accurately define a phenotype. Additionally, integrating higher order structural features with  
261 ranked gene lists through an autoencoder, can be used to precisely identify outlier samples  
262 between distinct gene expression datasets, facilitating interoperability between experiments that  
263 use differing transcriptomic methodology. Three key findings emerge from this study.

264 First, we define complementary metrics for evaluating the robustness of the GES: consistency,  
265 corresponds to the overlap of top ranked genes based on expression level ( $J_C$ ; **Fig. 1**); and  
266 predictivity assesses the predictive power of a phenotype using GES derived in different samples.  
267 (**Fig. 1,3-5**).

268 Second, we develop a new signature type termed structural gene expression signature (sGES),  
269 using features derived from various levels of protein structure (**Fig. 1**). The structural signature  
270 alone is able to characterize biological phenomena such as tissue type (**Fig. 2**). sGES overall  
271 improve the consistency of GES, while not impacting the predictive performance of signatures  
272 both within the same GES dataset and across gene expression datasets (**Fig. 3-4**).

273 We also observed that integration of sGES and GES (using an autoencoder) facilitates the  
274 identification outliers among experimental samples enabling the filtering of unrelated samples to  
275 identify a robust expression signature and improve the reproducibility of transcriptomics analysis  
276 studies (**Fig. 5**).

277 Third, the structural signature was tested on multiple independent datasets, including a newly  
278 generated set of differentially expressed genes from DToxS (**Fig. 6**). This finding shows that  
279 distinct structural signatures can also be used to characterize the effects of perturbation. For  
280 example, structural signatures distinguish kinase inhibitors from anthracyclines, since  
281 anthracyclines down regulate several folds associated with tRNA regulatory factors. It has been  
282 shown that doxorubicin and its analogs bind to tRNA molecules which has been thought to  
283 contribute to their antitumor activity; however, explicit downregulation of tRNA molecules has  
284 not been previously reported, demonstrating a potential novel mechanism of anthracycline drug  
285 action (31–33). We expect that further investigation of sGES can lead to the identification of co-  
286 expressed structures which may reveal novel interactions between certain types proteins.

## 288 **Materials and Methods**

### 289 **Computation of gene set consistency**

290 Gene expression data was downloaded from the GTEx, version 7. For each experimental sample,  
291 each gene was sorted by expression level, in transcripts per million (TPM), and the top 50, 250,  
292 and 1,000 expressed genes were selected. For each pair of experimental samples from the same  
293 tissue subtype, the Jaccard coefficient ( $J_C$ ) was calculated to measure the overlap of GES between  
294 samples of the same tissue type. The Jaccard Coefficient  $J_C$  was computed as follows:  
295

296 Eqn. 1 
$$J_c = \frac{|A \cap B|}{|A \cup B|}$$

297 Where  $A$  and  $B$  are sets of genes names of size  $N$  (the top 50, 250, and 1,000 expressed genes).  
298 Distributions of  $J_C$  for each gene set size, from selected tissues, were collected to measure  
299 robustness transcriptional signatures. A null distribution was generated by computing 1,000  
300 bootstrap  $J_C$  values between pairs of gene sets from distinct tissue types, without replacement, for  
301 gene sets of sizes 50, 250, and 1,000.

### 302 **Definition of a structural gene expression signature (sGES)**

303 A structural signature for each gene set was determined by identifying available structural  
304 features from the encoded protein of each gene (**Fig. 1**). We defined a structural feature as a  
305 member of the structural hierarchy from the Structural Classification of Proteins extended  
306 (SCOPe) database (version 2.07). Here, structural features such as domains are categorized into  
307 families, which are categorized into superfamilies, which are further classified into distinct folds.  
308 We used HHpred (version 3.2.0) to annotate the SCOPe structural features of each protein, in the  
309 entire proteome. We used the following minimum threshold values for assigning SCOPe  
310 identifiers to proteins: length of alignment to a structure 30 residues, probability score: 50,  
311 overlap coverage: 80%,  $p$ -value: 1e-05, e-value: 1e-05, percent identity: 30%, coverage against  
312 template 30%.

313 In addition to the SCOPe hierarchy, we also obtained InterProScan (version 5.36) protein domain  
314 annotations for the human proteome, from UniProt (downloaded June 2018). For a given gene set,  
315 each structural feature was evaluated for enrichment in the gene set using a one-sided Fisher's  
316 exact test, comparing the counts of the structural feature in the given gene set to the counts of  
317 each structural feature in the human proteome. For each gene set, a resulting structural signature  
318 is derived at the domain, family, superfamily, and fold levels, along with the log<sub>10</sub>x change, the  
319  $p$ -value of enrichment (association), and the Bonferroni adjusted  $p$ -value ( $q$ -value) for each  
320 structural feature.

### 321 **A random forest algorithm for predicting tissue type**

322 We trained a random forest classifier to predict tissue labels from gene set sizes of 50, 250, and  
323 1,000 from GTEx expression data. We used a random forest model from the R package Ranger,  
324 for each sample from GTEx where each feature was a gene, and the value was the rank of the  
325 gene, based on the TPM observed from RNA sequencing. Genes not seen in a sample's gene set  
326 were given a value of 0. The random forest model was trained using default parameters ( $mtry$   
327 =20,  $ntree$  = 100). Ten-fold cross validation was used to measure performance of the GES, using  
328 a 50/50 testing-training, per tissue, split; meaning 50% of all samples, per tissue was used for  
329 either testing and training, with replacement. Receiver operator curves (ROC) were generated  
330 using the pROC package in the R programming language. Importantly, we did not perform  
331 parameter optimization for the random forest method since our goal was not optimal predictive  
332 performance, but rather to determine the baseline predictive performance of GES.

### 333 **Predictivity of random forest models on ARCHS4 gene sets**

334 Gene expression datasets of the following tissues: adipose, brain, colon, esophagus, fallopian  
335 tube, heart, kidney, liver, lung, muscle, nerve, ovary, pancreas, prostate, small intestine, spleen,  
336 stomach, testis, thyroid, uterus, vagina, and whole blood, were downloaded from the ARCHS4  
337 database (March 2019). The top 250 overexpressed genes from each of the samples of the tissue

338 types were obtained by ranking the read counts of the Kalisto aligned expression data. We then  
339 predicted ARCHS4 tissue class using the random forest model trained on GTEx GES.

#### 340 ***Signature consistency***

341 A structural signature was obtained for gene sets of sizes 50 to 1,000, across all GTEx tissue  
342 types. Pairwise Jaccard coefficients ( $J_C$ ; Eqn. 1) were then computed between structural  
343 signatures of the same gene set size, and the same tissue. The median  $J_C$  at each gene set size per  
344 tissue defined the overall consistency.

#### 345 ***Clustering GTEx samples***

346 For each tissue sample, the log<sub>10</sub>X change for each structure in the structural signature derived at  
347 250 genes was used as input for t-distributed Stochastic Network Embedding (t-SNE) using the  
348 Rtsne package, using default perplexity (28) settings and was run for 1,000 iterations. For tissues  
349 where a structure was not observed, a value of 0 was used.

#### 350 ***sGES predictivity***

351 As described above for GES, 10x cross validation was performed for predicting GTEx tissues  
352 class from the  $p$ -value of association of each structural feature in the signature. Structural  
353 signatures were generated from the ARCHS4 gene signature set and were used to validate the  
354 performance of the random forest classifier trained on GTEx structural signatures.

#### 355 ***Integration of GES and sGES***

356 A stacked denoising autoencoder was used to embed structural signatures into a lower  
357 dimensionality matrix. We utilized a typical symmetrical autoencoder architecture of 3 dense  
358 (fully connected) encoding and decoding layers with 100, 50, 25 neurons and a bottleneck layer of  
359 10 neurons using the Keras package in R. Each layer's activation function was set to 'relu',  
360 except for the final layer whose activation function was set to 'sigmoid'. We used the mean  
361 squared error between the input and output layers as the loss function for the model, ran the  
362 autoencoder for 50 epochs and utilized the 'adam' optimizer to update network weights. For each  
363 of the structural layers the bottleneck layer was selected and combined into a flattened matrix.

#### 364 ***Interoperability of GTEx and ARCHS4 GES***

365 We then used two simple neural network models to predict 1) ARCHS4 tissue classes trained on  
366 the integrated signature of GTEx data, and 2) GTEx tissue classes from ARCHS4 integrated  
367 signatures to investigate interoperability of the two datasets. The neural network architecture is as  
368 follows: 3 densely connected hidden layers of 100 neurons each using the Keras package in R.  
369 The input layer and the first two hidden layers utilized the 'relu' activation function, while the  
370 final hidden layer used the 'softmax' activation function. The neural network used the 'adam'  
371 optimizer, and the 'categorical\_crossentropy' loss function since the output layer consisted of 22  
372 tissue categories.

#### 373 ***Experimental protocols for cell culture, drug treatment and transcriptomics***

374 Details of the experimental protocols for cell culture, drug treatment and transcriptomics have  
375 been described as step-by-step standard operating procedures for the various experiments  
376 available on [www.dtox.org](http://www.dtox.org).

#### 377 ***Classification of Promocell Cardiomyocyte cell lines***

378 For each control Promocell cardiomyocyte sample that were not exposed to a perturbation, a set of  
379 250 top overexpressed genes were obtained. Structural signatures were generated and plotted  
380 against a t-SNE of GTEx samples, using the log<sub>10</sub>X change of each structural feature. Pairwise  
381 Euclidean distances were taken between each control Promocell sample and all other samples in  
382 GTEx to determine the tissue type Promocells were most similar to.

#### 383 ***Processing and exploratory analysis of gene expression data***

384 The median log-transformed gene expression fold-change value was calculated across all cell  
385 lines for each individual small molecule drug. The resulting matrix of gene fold change values by  
386 drugs was used for the regression analysis. To obtain insight in the general patterns present in this  
387 drug-perturbed transcriptomics dataset, we generated rankings of the top 500 genes for each drug,



388 by their absolute mean fold change value, i.e. whether positive or negative. For each of these  
389 drug-associated rankings we determined the frequency of these changes being also present in the  
390 ranking of other drugs, e.g. the similarity in genes present in the top 250 gene lists for each drug.  
391 This was visualized using the Jc, and by plotting the most highly drug-connected genes against  
392 the associated drugs. Principal component analysis for the first 3 principal components on the  
393 absolute mean fold-change values for each drug was performed to further assess similarity  
394 between drugs in their gene expression values.

### 395 ***Structural characterization of DEGs from perturbation studies***

396 For each experimental sample from the DToxS set, the top 250 DEGs were obtained by ranking  
397 the observed  $p$ -value for each gene. Structural enrichment was performed for all DEGs combined,  
398 only overexpressed genes (by positive  $\log_{10}$ x change) or only underexpressed genes (by negative  
399  $\log_{10}$ x change). The  $\log_{10}$ x change of each structure in the structural signature of the combined  
400 gene set was used for t-SNE clustering, where structures that were unseen for a given gene set  
401 were set to 0. Each drug is colored by their level 4 Anatomic Therapeutic Code (ATC), if  
402 available. Otherwise, drugs were manually assigned to an ATC code based on the known target of  
403 the drug tested.

### 404 ***Clustering of kinase inhibitors***

405 Selected kinase inhibitors were hierarchically clustered based on the  $\log_{10}$ x change of each  
406 structural feature from over- and under expressed gene sets using the Ward method from the  
407 hclust method in the R programming language.

## 409 **References and Notes**

- 410 1. G. W. Gundersen, K. M. Jagodnik, H. Woodland, N. F. Fernandez, K. Sani, A. B. Dohlman, P. M.-  
411 U. Ung, C. D. Monteiro, A. Schlessinger, A. Ma'ayan, GEN3VA: aggregation and analysis of gene  
412 expression signatures from related studies. *BMC Bioinformatics*. **17**, 461 (2016).
- 413 2. A. Shafi, T. Nguyen, A. Peyvandipour, S. Draghici, GSMA: an approach to identify robust global  
414 and test Gene Signatures using Meta-Analysis. *Bioinformatics*, doi:10.1093/bioinformatics/btz561.  
415
- 416 3. HiFreSP: A novel high-frequency sub-pathway mining approach to identify robust prognostic gene  
417 signatures | Briefings in Bioinformatics | Oxford Academic, (available at  
418 <https://academic.oup.com/bib/advance-article/doi/10.1093/bib/bbz078/5536887>).
- 419 4. The Gene Ontology Resource: 20 years and still GOing strong. *Nucleic Acids Res.* **47**, D330–D338  
420 (2019).
- 421 5. M. Ashburner, C. A. Ball, J. A. Blake, D. Botstein, H. Butler, J. M. Cherry, A. P. Davis, K. Dolinski,  
422 S. S. Dwight, J. T. Eppig, M. A. Harris, D. P. Hill, L. Issel-Tarver, A. Kasarskis, S. Lewis, J. C.  
423 Matese, J. E. Richardson, M. Ringwald, G. M. Rubin, G. Sherlock, Gene Ontology: tool for the  
424 unification of biology. *Nat Genet.* **25**, 25–29 (2000).
- 425 6. W. H. Khoo, G. Ledergor, A. Weiner, D. L. Roden, R. L. Terry, M. M. McDonald, R. C. Chai, K. De  
426 Veirman, K. L. Owen, K. S. Opperman, K. Vandyke, J. R. Clark, A. Seckinger, N. Kovacic, A.  
427 Nguyen, S. T. Mohanty, J. A. Pettitt, Y. Xiao, A. P. Corr, C. Seeliger, M. Novotny, R. S. Lasken, T.  
428 V. Nguyen, B. O. Oyajobi, D. Aftab, A. Swarbrick, B. Parker, D. R. Hewett, D. Hose, K.  
429 Vanderkerken, A. C. W. Zannettino, I. Amit, T. G. Phan, P. I. Croucher, A niche-dependent myeloid  
430 transcriptome signature defines dormant myeloma cells. *Blood*. **134**, 30–43 (2019).
- 431 7. M. C. Liu, B. N. Pitcher, E. R. Mardis, S. R. Davies, P. N. Friedman, J. E. Snider, T. L. Vickery, J. P.  
432 Reed, K. DeSchryver, B. Singh, W. J. Gradishar, E. A. Perez, S. Martino, M. L. Citron, L. Norton, E.  
433 P. Winer, C. A. Hudis, L. A. Carey, P. S. Bernard, T. O. Nielsen, C. M. Perou, M. J. Ellis, W. T.

- 434 Barry, PAM50 gene signatures and breast cancer prognosis with adjuvant anthracycline- and taxane-  
435 based chemotherapy: correlative analysis of C9741 (Alliance). *npj Breast Cancer*. **2**, 15023 (2016).
- 436 8. A. Subramanian, R. Narayan, S. M. Corsello, D. D. Peck, T. E. Natoli, X. Lu, J. Gould, J. F. Davis,  
437 A. A. Tubelli, J. K. Asiedu, D. L. Lahr, J. E. Hirschman, Z. Liu, M. Donahue, B. Julian, M. Khan, D.  
438 Wadden, I. Smith, D. Lam, A. Liberzon, C. Toder, M. Bagul, M. Orzechowski, O. M. Enache, F.  
439 Piccioni, S. A. Johnson, N. J. Lyons, A. H. Berger, A. Shamji, A. N. Brooks, A. Vrcic, C. Flynn, J.  
440 Rosains, D. Takeda, R. Hu, D. Davison, J. Lamb, K. Ardlie, L. Hogstrom, P. Greenside, N. S. Gray,  
441 P. A. Clemons, S. Silver, X. Wu, W.-N. Zhao, W. Read-Button, X. Wu, S. J. Haggarty, L. V. Ronco,  
442 J. S. Boehm, S. L. Schreiber, J. G. Doench, J. A. Bittker, D. E. Root, B. Wong, T. R. Golub, A Next  
443 Generation Connectivity Map: L1000 platform and the first 1,000,000 profiles. *Cell*. **171**, 1437-  
444 1452.e17 (2017).
- 445 9. A. Raj, A. van Oudenaarden, Nature, Nurture, or Chance: Stochastic Gene Expression and Its  
446 Consequences. *Cell*. **135**, 216–226 (2008).
- 447 10. P. Patil, P.-O. Bachant-Winner, B. Haibe-Kains, J. T. Leek, Test set bias affects reproducibility of  
448 gene signatures. *Bioinformatics*. **31**, 2318–2323 (2015).
- 449 11. L. Ein-Dor, O. Zuk, E. Domany, Thousands of samples are needed to generate a robust gene list for  
450 predicting outcome in cancer. *PNAS*. **103**, 5923–5928 (2006).
- 451 12. K. Anderson, K. R. Hess, M. Kapoor, S. Tirrell, J. Courtemanche, B. Wang, Y. Wu, Y. Gong, G. N.  
452 Hortobagyi, W. F. Symmans, L. Pusztai, Reproducibility of Gene Expression Signature–Based  
453 Predictions in Replicate Experiments. *Clin Cancer Res*. **12**, 1721–1727 (2006).
- 454 13. R. A. Ach, A. Floore, B. Curry, V. Lazar, A. M. Glas, R. Pover, A. Tsalenko, H. Ripoché, F.  
455 Cardoso, M. S. d’Assignies, L. Bruhn, L. J. Van’t Veer, Robust interlaboratory reproducibility of a  
456 gene expression signature measurement consistent with the needs of a new generation of diagnostic  
457 tools. *BMC Genomics*. **8**, 148 (2007).
- 458 14. M. Crow, N. Lim, S. Ballouz, P. Pavlidis, J. Gillis, Predictability of human differential gene  
459 expression. *PNAS*. **116**, 6491–6500 (2019).
- 460 15. N. U. Rashid, Q. Li, J. J. Yeh, J. G. Ibrahim, Modeling Between-Study Heterogeneity for Improved  
461 Reproducibility in Gene Signature Selection and Clinical Prediction. *arXiv:1708.05508 [stat]* (2017)  
462 (available at <http://arxiv.org/abs/1708.05508>).
- 463 16. T. E. Sweeney, W. A. Haynes, F. Vallania, J. P. Ioannidis, P. Khatri, Methods to increase  
464 reproducibility in differential gene expression via meta-analysis. *Nucleic Acids Res*. **45**, e1 (2017).
- 465 17. M. R. Birtwistle, J. Hansen, J. M. Gallo, S. Muppirisetty, P. M.-U. Ung, R. Iyengar, A. Schlessinger,  
466 in *Systems Pharmacology and Pharmacodynamics*, D. E. Mager, H. H. C. Kimko, Eds. (Springer  
467 International Publishing, Cham, 2016; [http://link.springer.com/10.1007/978-3-319-44534-2\\_4](http://link.springer.com/10.1007/978-3-319-44534-2_4)), vol.  
468 23, pp. 53–80.
- 469 18. M. Rahilly, P. J. Carder, A. al Nafussi, D. J. Harrison, Distribution of glutathione S-transferase  
470 isoenzymes in human ovary. *J. Reprod. Fertil*. **93**, 303–311 (1991).
- 471 19. S. N. Kalam, S. Dowland, L. Lindsay, C. R. Murphy, Microtubules are reorganised and fragmented  
472 for uterine receptivity. *Cell Tissue Res*. **374**, 667–677 (2018).
- 473 20. B. Rost, J. Liu, R. Nair, K. O. Wrzeszczynski, Y. Ofran, Automatic prediction of protein function.  
474 *CMLS, Cell. Mol. Life Sci*. **60**, 2637–2650 (2003).

- 475 21. Q. C. Zhang, D. Petrey, L. Deng, L. Qiang, Y. Shi, C. A. Thu, B. Bisikirska, C. Lefebvre, D. Accili,  
476 T. Hunter, T. Maniatis, A. Califano, B. Honig, Structure-based prediction of protein–protein  
477 interactions on a genome-wide scale. *Nature*. **490**, 556–560 (2012).
- 478 22. X. Wang, X. Wei, B. Thijssen, J. Das, S. M. Lipkin, H. Yu, Three-dimensional reconstruction of  
479 protein networks provides insight into human genetic disease. *Nat Biotechnol*. **30**, 159–164 (2012).
- 480 23. Beyond accuracy: Measures for assessing machine learning models, pitfalls and guidelines | bioRxiv,  
481 (available at <https://www.biorxiv.org/content/10.1101/743138v1>).
- 482 24. J. Lonsdale, J. Thomas, M. Salvatore, R. Phillips, E. Lo, S. Shad, R. Hasz, G. Walters, F. Garcia, N.  
483 Young, B. Foster, M. Moser, E. Karasik, B. Gillard, K. Ramsey, S. Sullivan, J. Bridge, H. Magazine,  
484 J. Syron, J. Fleming, L. Siminoff, H. Traino, M. Mosavel, L. Barker, S. Jewell, D. Rohrer, D.  
485 Maxim, D. Filkins, P. Harbach, E. Cortadillo, B. Berghuis, L. Turner, E. Hudson, K. Feenstra, L.  
486 Sobin, J. Robb, P. Branton, G. Korzeniewski, C. Shive, D. Tabor, L. Qi, K. Groch, S. Nampally, S.  
487 Buia, A. Zimmerman, A. Smith, R. Burges, K. Robinson, K. Valentino, D. Bradbury, M. Cosentino,  
488 N. Diaz-Mayoral, M. Kennedy, T. Engel, P. Williams, K. Erickson, K. Ardlie, W. Winckler, G. Getz,  
489 D. DeLuca, D. MacArthur, M. Kellis, A. Thomson, T. Young, E. Gelfand, M. Donovan, Y. Meng, G.  
490 Grant, D. Mash, Y. Marcus, M. Basile, J. Liu, J. Zhu, Z. Tu, N. J. Cox, D. L. Nicolae, E. R.  
491 Gamazon, H. K. Im, A. Konkashbaev, J. Pritchard, M. Stevens, T. Flutre, X. Wen, E. T. Dermitzakis,  
492 T. Lappalainen, R. Guigo, J. Monlong, M. Sammeth, D. Koller, A. Battle, S. Mostafavi, M.  
493 McCarthy, M. Rivas, J. Maller, I. Rusyn, A. Nobel, F. Wright, A. Shabalina, M. Feolo, N. Sharopova,  
494 A. Sturcke, J. Paschal, J. M. Anderson, E. L. Wilder, L. K. Derr, E. D. Green, J. P. Struwing, G.  
495 Temple, S. Volpi, J. T. Boyer, E. J. Thomson, M. S. Guyer, C. Ng, A. Abdallah, D. Colantuoni, T. R.  
496 Insel, S. E. Koester, A. R. Little, P. K. Bender, T. Lehner, Y. Yao, C. C. Compton, J. B. Vaught, S.  
497 Sawyer, N. C. Lockhart, J. Demchok, H. F. Moore, The Genotype-Tissue Expression (GTEx)  
498 project. *Nature Genetics*. **45**, 580–585 (2013).
- 499 25. A. Lachmann, D. Torre, A. B. Keenan, K. M. Jagodnik, H. J. Lee, L. Wang, M. C. Silverstein, A.  
500 Ma’ayan, Massive mining of publicly available RNA-seq data from human and mouse. *Nature*  
501 *Communications*. **9**, 1366 (2018).
- 502 26. N. K. Fox, S. E. Brenner, J.-M. Chandonia, SCOPe: Structural Classification of Proteins—extended,  
503 integrating SCOP and ASTRAL data and classification of new structures. *Nucleic Acids Research*.  
504 **42**, D304–D309 (2013).
- 505 27. A. L. Mitchell, T. K. Attwood, P. C. Babbitt, M. Blum, P. Bork, A. Bridge, S. D. Brown, H.-Y.  
506 Chang, S. El-Gebali, M. I. Fraser, J. Gough, D. R. Haft, H. Huang, I. Letunic, R. Lopez, A. Luciani,  
507 F. Madeira, A. Marchler-Bauer, H. Mi, D. A. Natale, M. Necci, G. Nuka, C. Orengo, A. P.  
508 Pandurangan, T. Paysan-Lafosse, S. Pesseat, S. C. Potter, M. A. Qureshi, N. D. Rawlings, N.  
509 Redaschi, L. J. Richardson, C. Rivoire, G. A. Salazar, A. Sangrador-Vegas, C. J. A. Sigrist, I.  
510 Sillitoe, G. G. Sutton, N. Thanki, P. D. Thomas, S. C. E. Tosatto, S.-Y. Yong, R. D. Finn, InterPro in  
511 2019: improving coverage, classification and access to protein sequence annotations. *Nucleic Acids*  
512 *Research*. **47**, D351–D360 (2018).
- 513 28. L. van der Maaten, G. Hinton, *Visualizing data using t-SNE* (2008).
- 514 29. T. Barrett, S. E. Wilhite, P. Ledoux, C. Evangelista, I. F. Kim, M. Tomashevsky, K. A. Marshall, K.  
515 H. Phillippy, P. M. Sherman, M. Holko, A. Yefanov, H. Lee, N. Zhang, C. L. Robertson, N. Serova,  
516 S. Davis, A. Soboleva, NCBI GEO: archive for functional genomics data sets—update. *Nucleic*  
517 *Acids Res*. **41**, D991–D995 (2013).
- 518 30. G. E. Hinton, R. R. Salakhutdinov, Reducing the Dimensionality of Data with Neural Networks.  
519 *Science*. **313**, 504–507 (2006).

- 520 31. D. Agudelo, P. Bourassa, G. Bérubé, H. A. Tajmir-Riahi, Review on the binding of anticancer drug  
521 doxorubicin with DNA and tRNA: Structural models and antitumor activity. *Journal of*  
522 *Photochemistry and Photobiology B: Biology*. **158**, 274–279 (2016).
- 523 32. D. Agudelo, P. Bourassa, M. Beaugard, G. Bérubé, H.-A. Tajmir-Riahi, tRNA Binding to  
524 Antitumor Drug Doxorubicin and Its Analogue. *PLoS One*. **8** (2013),  
525 doi:10.1371/journal.pone.0069248.
- 526 33. S. Charak, M. Shandilya, R. Mehrotra, RNA targeting by an anthracycline drug: spectroscopic and in  
527 silico evaluation of epirubicin interaction with tRNA. *J. Biomol. Struct. Dyn.*, 1–11 (2019).

528

## 529 Acknowledgments

530

531 **General:** We would like to thank the Alexander Lachmann and Avi Ma'ayan (both Mount  
532 Sinai), and Burkhard Rost (Technical University Munich) for their insightful discussions.

533

534 **Funding:** This work was supported in part by the National Institutes of Health grants R01  
535 GM108911 (A.S.), T32 GM062754 to (R.R.), and U54 HG008098 (Y. X., J.G.C.H, J.H.,  
536 E.A.S., M.R.B., E.A., R.I. and A.S.).

537

538 **Author contributions:** R.R., R.I. and A.S. conceptualized the study. R.R. curated the  
539 data, performed the formal analysis, developed the methodology for structural signatures,  
540 trained and validated the machine learning models used in the analysis. Y.X. performed  
541 the transcriptomics analysis of the Promocell data. E.S, M.B, and E.A provided critical  
542 analyses and insight into study design. R.R and A.S. wrote the analysis. R.R, A.S, E.S.,  
543 M.B., E.A., R.I., J.H., J.G.C.H edited and reviewed the analysis. R.I and A.S provided  
544 funding for the analysis.

545

546 **Competing interests:** R.R. and A.S. are co-founders of AIchemy Inc.

547

548 **Data and materials availability:** All data is available on Github.

549

550



551 **Figures and Tables**

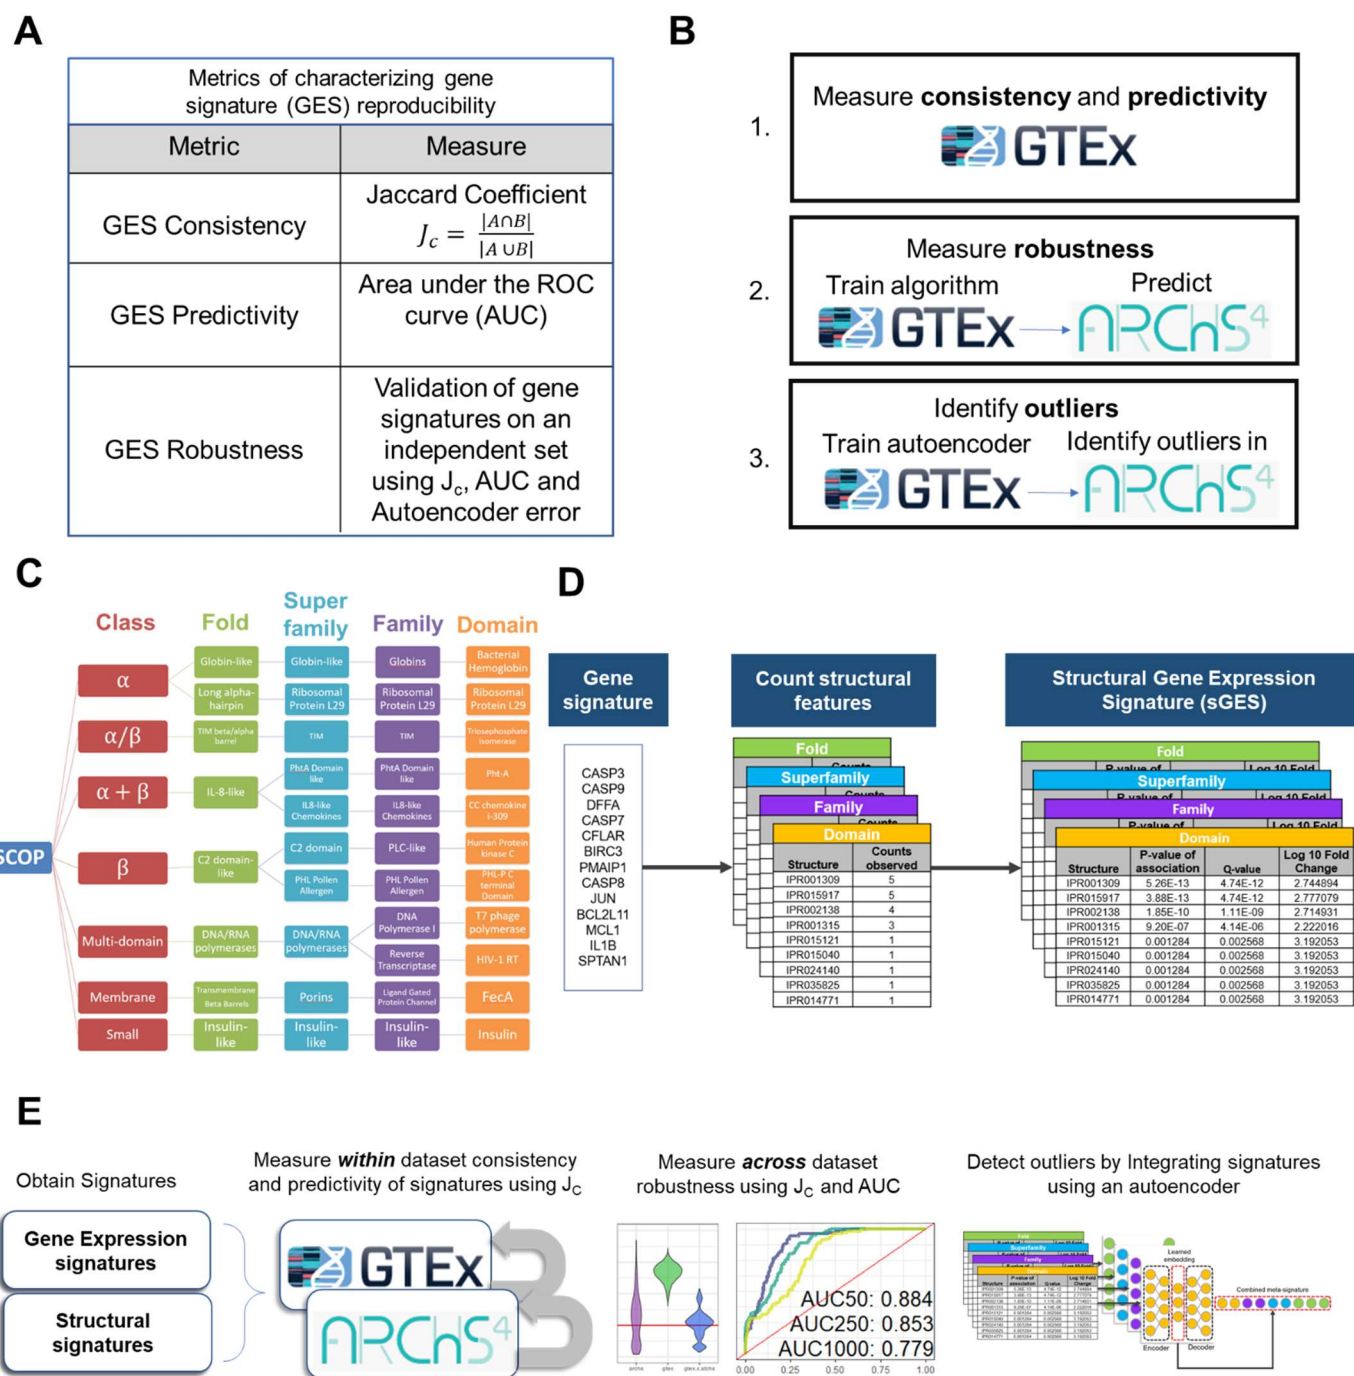

552

553 **Fig. 1: Study design.** A) Evaluation metrics for GES (GS) consistency, predictivity, and  
 554 robustness. B) Approach of measuring consistency, robustness and outlier detection. C) SCOP  
 555 hierarchy of protein structural features, with examples. D) Workflow to generate structural gene  
 556 expression signatures (sGES). E) Workflow for evaluating the reproducibility of GES, structural  
 557 signatures, and integrated signatures from GTEX and ARCHS4.  
 558

559

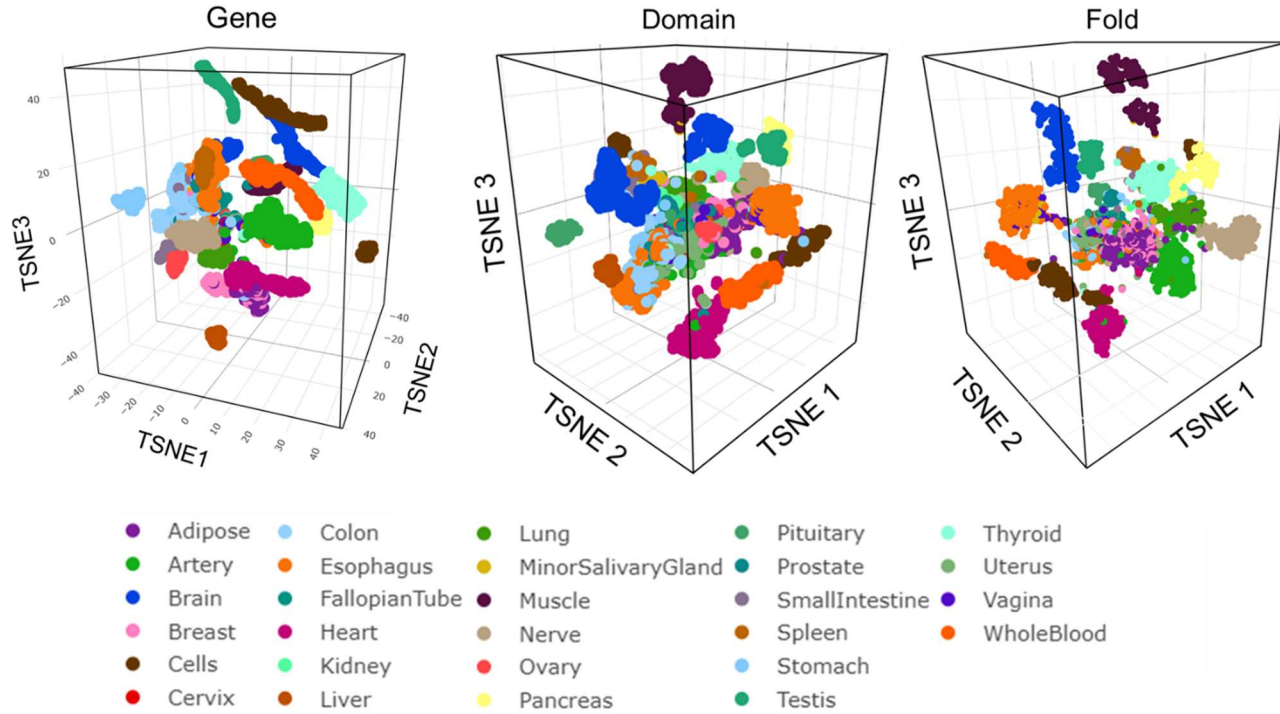

560

561 **Fig. 2: Protein structure enrichment clusters tissue-specific gene expression.** The top 250  
562 highest expressed genes from GTEx (in terms of transcripts per million) were obtained. Tissue  
563 samples were then clustered based on the presence or absence of the GES using t-SNE. sGES  
564 were then derived from the GES, and tissue samples were clustered by using t-SNE based on the  
565 presence or absence of structural features at the domain and fold levels. Each sample is colored by  
566 tissue type.

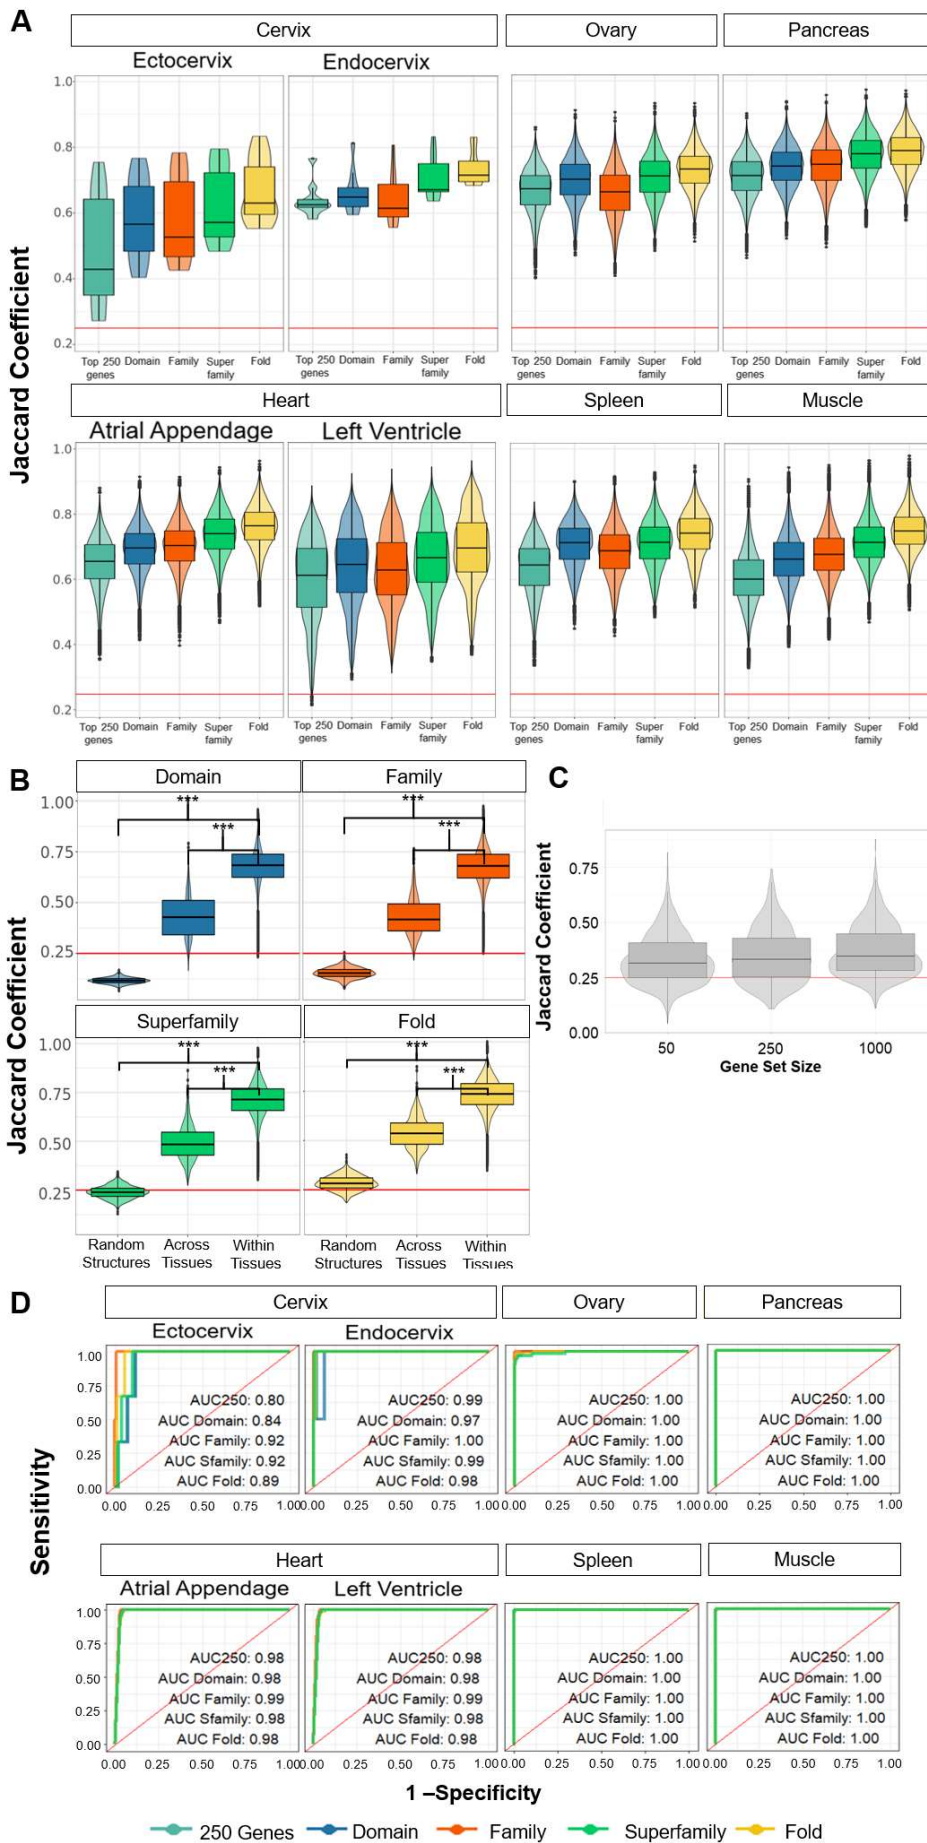

568 **Fig. 3: Signature consistency improves using protein structure.** A) Distributions of Jaccard  
569 coefficient ( $J_C$ ) values within tissue types. For each pairs of samples, in each tissue type (as  
570 cataloged by GTEx), a  $J_C$  was computed for the top 250 highly expressed genes (by TPM) and  
571 their derivative sGES at each structural level. The  $J_C$  is defined as the intersection over the union  
572 of two sets and can be thought of as the percentage overlap of two sets. All distributions are  
573 statistically significant from each other using pairwise t-tests, with FDR correction (**Table S2**).  
574 The red line indicates a  $J_C$  of 0.25. B) distributions if structures are randomly assigned to each  
575 gene (1,000 bootstraps). ‘Across tissues’ are  $J_C$  distributions between unlike tissue types (1,000  
576 bootstraps). ‘Within tissues’ are the  $J_C$  distributions between the same tissue type. Within tissue  
577 comparisons are significantly higher than random structure comparisons and  $J_C$  values between  
578 distinct tissue type. Red line indicates a  $J_C = 0.25$ . C) Pairwise GES  $J_C$  distributions across  
579 randomly selected, distinct tissues types, repeated 1,000 times. D) A random forest was trained  
580 using GES (of size 250) and sGES at different structural levels (Domain, Family, Superfamily  
581 [Sfamily], and Fold) for GTEx tissue expression data. Area under the curves (AUC) are displayed  
582 for each structural level.  
583



584

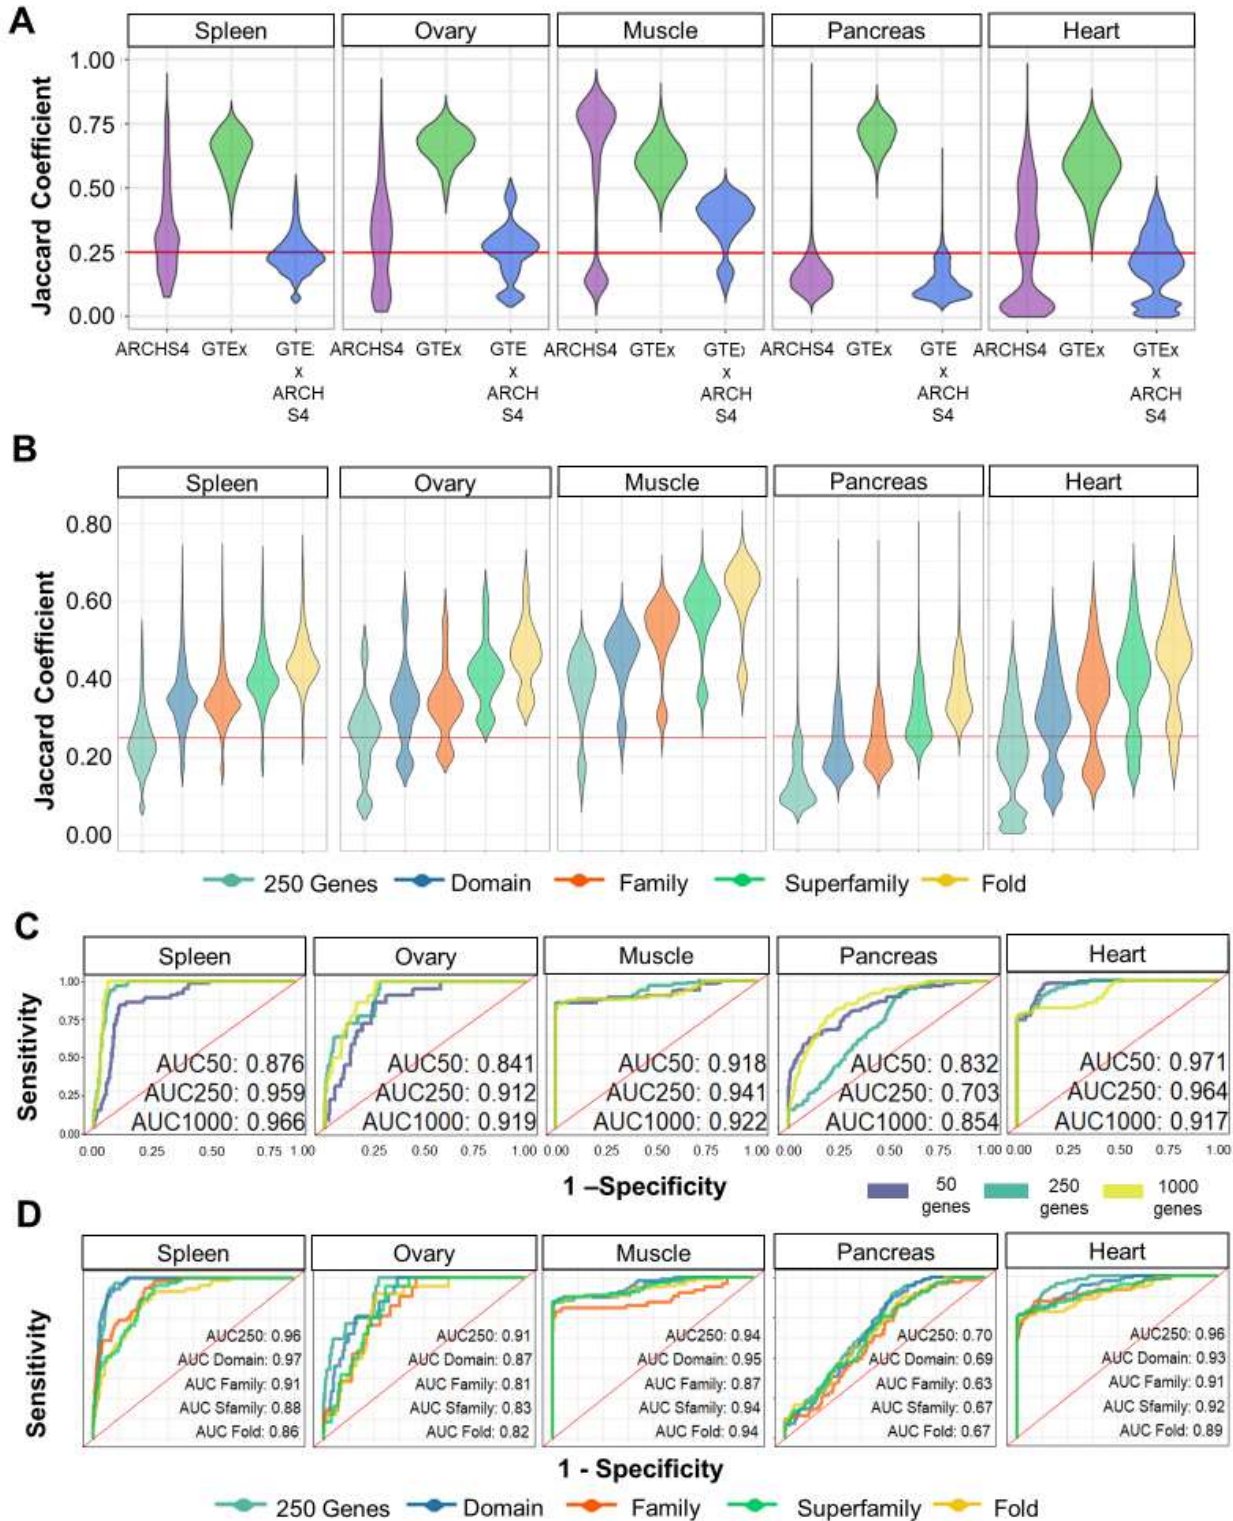

585

586 **Fig. 4: Robustness of GTEx GES using the ARCHS4 database.** A) Distributions of  $J_C$  values  
 587 for a gene signature size of 250 for tissues within the ARCHS4 database (purple), the GTEx  
 588 database (green), and across the ARCHS4 and GTEx databases (blue). Red line indicates a  $J_C =$   
 589 0.25. B) Overlap of GTEx sGES with ARCHS4 signatures, across all structure levels. Red line  
 590 indicates a  $J_C = 0.25$ . C) Predictive performance of a Random Forest model on GTEx gene sets of

591 size 50, 250, and 1,000 highly expressed genes for predicting tissues from the ARCHS4 database,  
592 after 10-fold cross validation. D) Performance of a random forest classifier to predict ARCHS4  
593 tissue type trained on GTEx top 250 GES or derived sGES.  
594

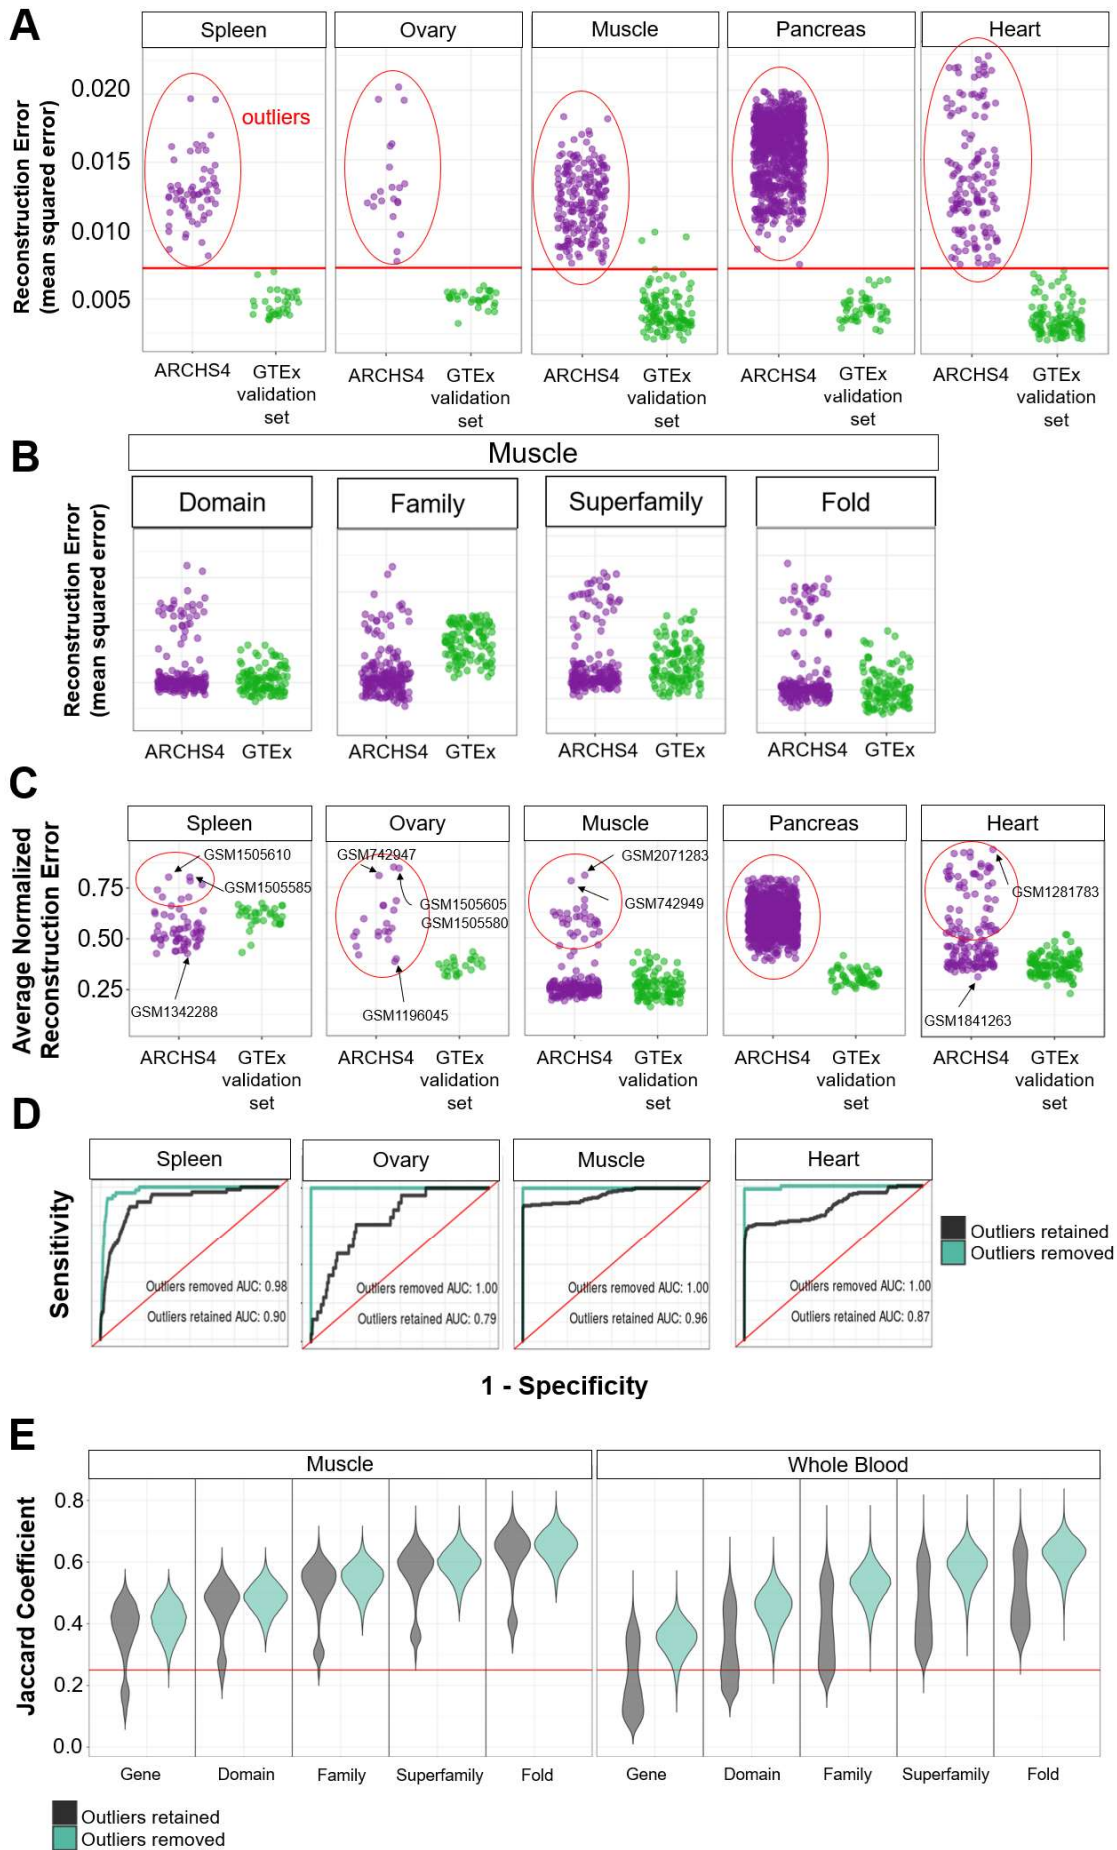

596 **Fig. 5: Integrated signatures enable identification of robust signatures across databases. A)**  
597 Detection of outlier samples compared to GTEx gene signatures using a stacked denoising  
598 autoencoder trained to reconstruct gene signature membership from GTEx gene signatures (of  
599 size 250). Samples with high reconstruction error indicate that the sample is an outlier when  
600 compared to GTEx gene signatures. The red line indicates error values 2 standard deviations away  
601 from the mean of the distribution of errors reconstructing a validation GTEx set (error of .00725).  
602 Overlap of GTEx GES and structural signatures with ARCHS4 signatures, across tissues. B)  
603 Outlier detection using distinct structural signature levels. C) Outlier detection using integrated  
604 signatures. D) Predictive performance of GTEx GES to predict ARCHS4 tissue types, before and  
605 after outliers were removed. E) Consistency of GES and sGES of across ARCHS4 and GTEx for  
606 muscle and whole blood tissue types, before outlier removal (black) and after outlier removal  
607 (turquoise). Red line indicates a  $J_C = 0.25$ .  
608



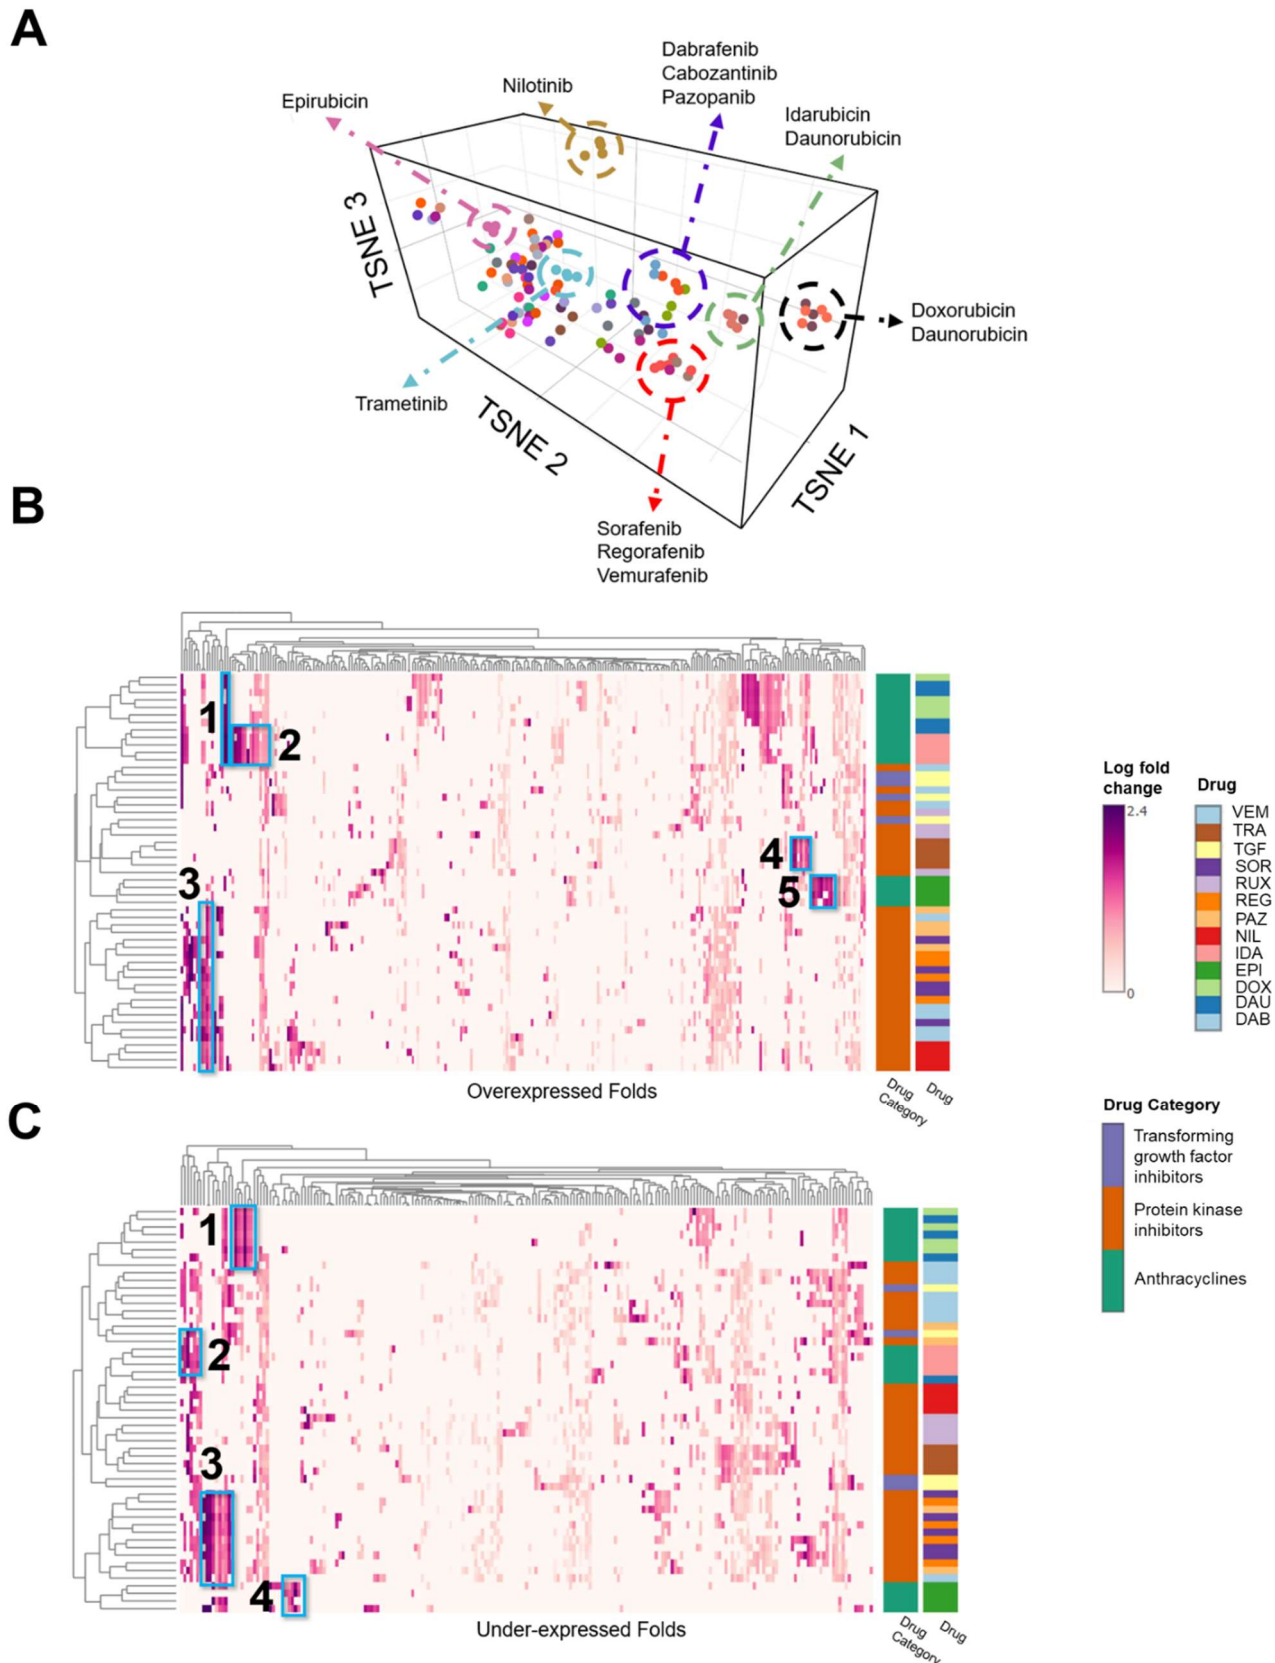

609  
610 **Fig. 6: Characterization of kinase inhibitor activity using structural signatures.** A) t-SNE  
611 clustering of fold signatures from distinct type of drugs on Promocell cardiomyocyte-like cell  
612 lines. Rows are labeled by Drug name, or level 3 ATC category. B) Overexpressed fold signatures

613 for certain drugs. C) Under-expressed fold signatures for certain drugs. Distinct over and under-  
614 expressed clusters of folds are given numbers and are described in **Tables 2-3**.  
615
